# Supplementary material for: Epitaxial growth and electronic properties of an antiferromagnetic semiconducting VI2 monolayer
Source: Royal Society of Chemistry journal article supplement (doi:10.1039/d2nr02367a), 2022-01-01
Supplement: d2nr02367a1.pdf [file d2nr02367a1.pdf]

# Supporting Information

## **Epitaxial growth and electronic properties of antiferromagnetic semiconducting VI<sub>2</sub> Monolayer**

Xuhan Zhou<sup>a,b,c</sup>, Zhe Wang<sup>d</sup>, Han Zhu<sup>a,b,c</sup>, Zizhao Liu<sup>a,b,c</sup>, Yusheng Hou<sup>a,c,\*</sup>, Donghui Guo<sup>a,c,\*</sup>, Dingyong Zhong<sup>a,b,c,\*</sup>

*<sup>a</sup> School of Physics, Sun Yat-sen University, 510275 Guangzhou, China*

*<sup>b</sup> State Key Laboratory for Optoelectronic Materials and Technologies, Sun Yat-sen University, 510275 Guangzhou, China*

*<sup>c</sup> Center for Neutron Science and Technology, School of Physics, Sun Yat-Sen University, Guangzhou, 510275, China*

*<sup>d</sup> State Key Laboratory of Surface Physics and Key Laboratory for Computational Physical Sciences (MOE) and Department of Physics, Fudan University, Shanghai 200433, China*

\*E-mail: [houysh@mail.sysu.edu.cn](mailto:huysh@mail.sysu.edu.cn)

\*E-mail: [guodonghui@mail.sysu.edu.cn](mailto:guodonghui@mail.sysu.edu.cn)

\*E-mail: [dyzhong@mail.sysu.edu.cn](mailto:dyzhong@mail.sysu.edu.cn)

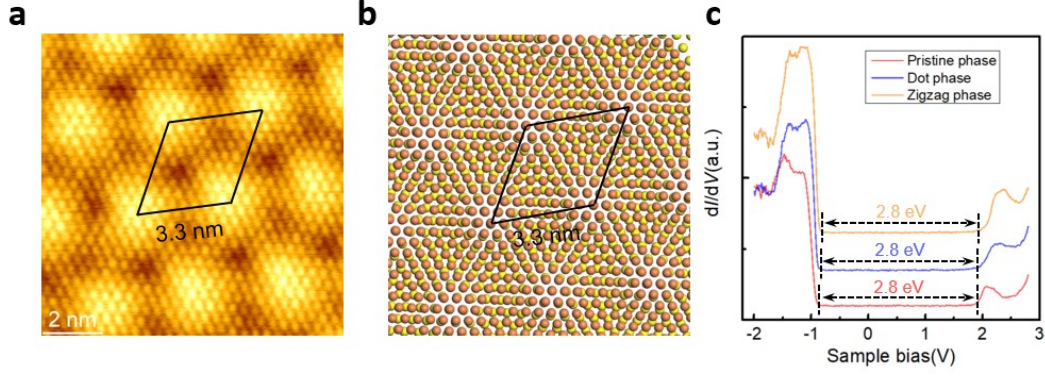

**Fig. S1** Moire superstructures formed by single-layer  $\text{VI}_2$  on iodine buffer layer. (a, b) The feasible schematic illustration of the dot phase. Yellow balls are iodine atoms of buffer layer on Au(111), and its period is 4.59 Å. Orange balls are iodine atoms in the bottom layer of  $\text{VI}_2$ , the other atoms are not displayed for simplicity. The Moiré pattern with periodicity of  $\sim 3.3$  nm, it is consistent with the experimental results. (c) The  $dI/dV$  spectra obtained on different Moire superstructures have a band gap of 2.8 eV and no obvious difference was observed.

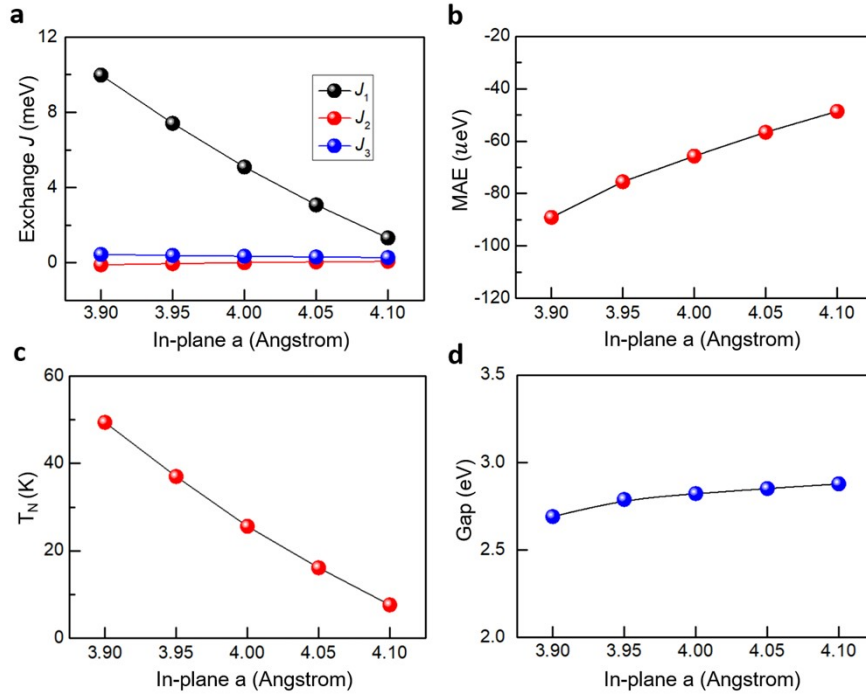

**Fig. S2** Magnetic properties of  $\text{VI}_2$  ML regulated by in-plane lattice constants. (a to d) DFT calculated exchange  $J$  Néel temperature  $T_N$ , magnetic anisotropy energy (MAE) and gap as a function of in-plane  $a$ .

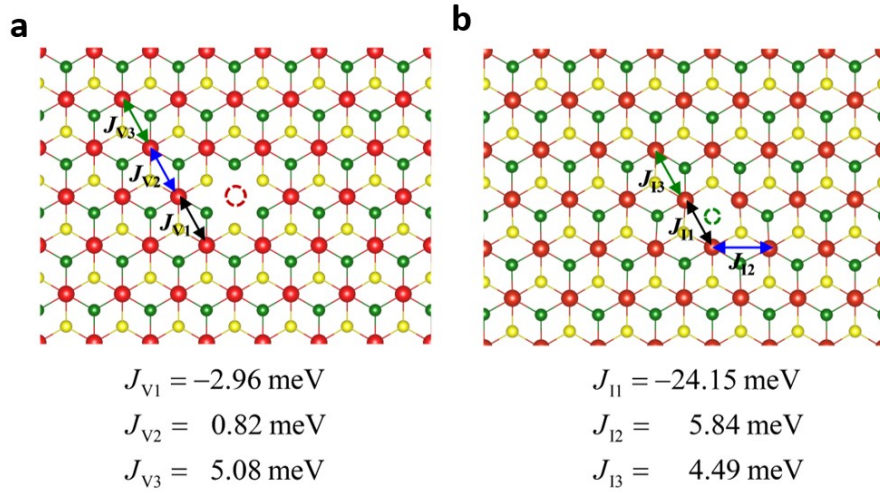

**Fig. S3** The Heisenberg exchange interactions between  $V^{2+}$  ions near vanadium and iodine vacancy defects. (a) Top view of one V vacancy defect in the  $5 \times 5$  supercell  $VI_2$  ML. The V vacancy defect is shown by the red empty circle. The back, blue and green double arrowed lines represent the considered Heisenberg exchange interactions  $J_{V1}$ ,  $J_{V2}$  and  $J_{V3}$  that are near the V vacancy defect. (b) Top view of one I vacancy defect in the  $5 \times 5$  supercell  $VI_2$  ML. The I vacancy defect is shown by the green empty circle. In (a) and (b), red, green and yellow balls represents V, upper and bottom I atoms, respectively. The back, blue and green double arrowed lines represent the considered Heisenberg exchange interactions  $J_{I1}$ ,  $J_{I2}$  and  $J_{I3}$  that are near the I vacancy defect.
